# Supplementary material for: Stress-Induced Catecholamines Attenuate Sorafenib Efficacy by Inhibiting Ferroptosis in β2-adrenergic Receptor Positive Renal Cell Carcinoma
Source: Research Square preprint supplement (doi:10.21203/rs.3.rs-7131878/v1), 2025-08-27
Supplement: Supplementary file 1 [file 051d9996adfbf28732f4f953.docx]

**Supplementary Text 4. Detailed procedures of siRNA**

We transfected human-specific siRNA targeting ADRB1 or ADRB2 (10 nM) using Lipofectamine RNAiMAX (Invitrogen, Thermo Fisher Scientific Inc.,). Kanamycin and bovine serum-free RPMI medium was used during transfection, and after 24 hours, the medium was replaced with RPMI medium containing 10% bovine serum. Cells were further cultured for 24 hours before being used for experiments. For ADRB1 knockdown, siADRB1(1) (ID:s1118), siADRB1(2) (ID:s1119) were used. For ADRB2 knockdown, siADRB2(1) (ID:s1122), siADRB2(2) (ID:s1123) were used. The Silencer Negative Control siRNA #1 (Cat. No. AM4611) was used as a negative control. ADRB siRNAs and negative control siRNA were purchased from Thermo Fisher Scientific.
