# Supplementary material for: Stress-Induced Catecholamines Attenuate Sorafenib Efficacy by Inhibiting Ferroptosis in β2-adrenergic Receptor Positive Renal Cell Carcinoma
Source: Research Square preprint supplement (doi:10.21203/rs.3.rs-7131878/v1), 2025-08-27
Supplement: Supplementary file 3 [file 2b39579bd109afedaa2d867a.docx]

**Supplementary Text 7. Detailed procedures of stressed mouse model and sorafenib administration**

All procedures were performed using female BALB/c nude mice (6-7 week old, 20-25 g) according to the animal welfare regulations of Yamagata University Faculty of Medicine based on the “Guidelines for the implementation of animal experiments” established by the Ministry of Education, Culture, Sports, Science, and Technology of Japan. All animal studies were approved by the institutional review board of Yamagata University. The mice were randomly divided into the following four groups: control + vehicle (n=5), control + sorafenib (n=5), stress + vehicle (n=5), stress + sorafenib (n=5). Mice were purchased from CLEA Japan Co., Ltd. (Tokyo, Japan). Blinding was not performed in this study. ACHN with ADRB2 knocked down by shRNA were injected with Matrigel (Corning Life Science, NY, USA) into the subcutaneous flank left side of mice, while negative control ACHN were injected into the right side. When the tumor volume of negative control ACHN reached approximately 100 mm3, the mice were divided into the following four groups: control + vehicle (n=5), control + sorafenib (n=5), stress + vehicle (n=5), stress + sorafenib (n=5). The mice were housed in metabolic cages for the first two weeks, and then in normal cages for the next two weeks. Their urine was collected in a tube containing hydrochloric acid for 24 hours over three days (day10-day12) and stored at -80℃ until analysis. The stress group of mice were subjected to stress by placed in a well ventilated 50 ml conical tube for 6 hours a day (from 9 am to 3 pm). The mice were treated with sorafenib (10 mg/kg body weight, in saline) or vehicle (saline), orally administered once a day. The drug administration and stress induction were conducted five days a week, and continued for four weeks. Tumor growth was measured every 2-3 days, and the volume of the xenograft tumors were calculated as length × width × thickness × 0.5. The mice were scheduled to be euthanized if their tumor size exceeded 1500 mm3. However, no mice reached this threshold, and none were excluded from the experiment for any reason. The sample size was calculated on a tumor volume difference of 110 mm3 between sorafenib-treated stressed mice and sorafenib-treated non-stressed mice, with a standard deviation of 60 mm3, a significance level of 0.05, and a statistical power of 0.8. Randomization and blinding were not performed in this study. After four weeks, all the mice were dissected under anesthesia, and blood samples were collected from the inferior vena cava. Subsequently, they were euthanized humanely. The blood samples were then processed to obtain plasma and stored at -80℃ until analysis. Tumor tissues were harvested. The measurement of adrenaline, noradrenaline, and dopamine in acidic urine, as well as the measurement of cortisol in plasma, was outsourced to NIKKEN SEIL Co., Ltd. (Shizuoka, Japan).
