# Supplementary material for: Stress-Induced Catecholamines Attenuate Sorafenib Efficacy by Inhibiting Ferroptosis in β2-adrenergic Receptor Positive Renal Cell Carcinoma
Source: Research Square preprint supplement (doi:10.21203/rs.3.rs-7131878/v1), 2025-08-27
Supplement: Supplementary file 4 [file 3706762b58d144c21aa30c4d.docx]

**Supplementary Text 10. Detailed procedures of assessment of ROS levels**

Cells were incubated with medium containing 5 µM CellRox Deep Red (Cat. No. C10422, Thermo Fisher Scientific Inc.,) at 37 °C for 3 hours. Next, cells were treated with ISO and/or erastin for 1 hour and collected using a cell detachment agent. After fixation with PBS containing 4% paraformaldehyde, the fluorescence intensity of the cells was measured using a flow cytometer (FACS Melody, BD, NJ, USA) and analyzed using FlowJo software version 10.8.1. The rate of increase in intracellular ROS was calculated using the following formula: Increase % ROS = 100 × [(fluorescence intensity after treatment with reagent) − (fluorescence intensity of no-treated cells)]/(fluorescence intensity of no-treated cells).
