# Supplementary material for: Stress-Induced Catecholamines Attenuate Sorafenib Efficacy by Inhibiting Ferroptosis in β2-adrenergic Receptor Positive Renal Cell Carcinoma
Source: Research Square preprint supplement (doi:10.21203/rs.3.rs-7131878/v1), 2025-08-27
Supplement: Supplementary file 5 [file 3ceefd83f0baff99cccc16d0.docx]

**Supplementary Text 8. Detailed procedures of shRNA**

Following the standard procedure, the vectors were transfected into HEK293T cells and lentivirus were packaged. ACHN cells in 6-well plate were infected with the concentrated virus for 72 hours. Puromycin was used to select lentiviral transfected ACHN cells. The expression of ADRB2 in the infected cells was validated by quantitative reverse transcription polymerase chain reaction and western blotting.
