# Supplementary material for: Stress-Induced Catecholamines Attenuate Sorafenib Efficacy by Inhibiting Ferroptosis in β2-adrenergic Receptor Positive Renal Cell Carcinoma
Source: Research Square preprint supplement (doi:10.21203/rs.3.rs-7131878/v1), 2025-08-27
Supplement: Supplementary file 6 [file 514bf646588d281fcd727b0d.docx]

**Supplementary Text 2. Detailed procedures of qRT-PCR**

RNA was extracted from cells using the Reliaprep RNA Cell Miniprep System (Promega, WI, USA), and cDNA was synthesized using the High Capacity cDNA Reverse Transcription Kit (Applied Biosystems, Thermo Fisher Scientific Inc., MA, USA). Real-time qRT-PCR was performed using Power Track SYBR Green Master Mix (Thermo Fisher Scientific Inc.,) and CFX Connect Real-Time System (BIO-RAD, Tokyo, Japan). The relative expression levels of mRNA were determined using the ΔCT method, which calculates the difference between the cycle threshold (CT) value of the target gene and that of the internal control gene, glyceraldehyde-3-phosphate dehydrogenase (GAPDH), which was used as an endogenous control. Primers used in this study were purchased from Integrated DNA Technologies (IA, USA): ADRB1-forward, 5’-TACGGCTCCTTCTTCTGCGA-3’; ADRB1-reverse, 5’-TGCATGAGGATGGGCAGGAA-3’; ADRB2-forward, 5’-ATGGTGTGGATTGTGTCAGGC-3’; ADRB-2 reverse, 5’-TGGAAGCGGCCCTCAGATTT-3’; GAPDH-forward, 5’-GCACCGTCAAGGCTGAGAAC-3’; GAPDH-reverse, 5’-TGGTGAAGACGCCAGTGG A-3’.
