# Supplementary material for: Stress-Induced Catecholamines Attenuate Sorafenib Efficacy by Inhibiting Ferroptosis in β2-adrenergic Receptor Positive Renal Cell Carcinoma
Source: Research Square preprint supplement (doi:10.21203/rs.3.rs-7131878/v1), 2025-08-27
Supplement: Supplementary file 7 [file 538e34862f5bb34e030047f4.docx]

**Supplementary Text 5. Detailed procedures of MTS assay**

Cells were seeded in 96-well plates. The next day, the medium was removed, and 50 µL of 2x concentrated ISO was added to each well. After 10 minutes, 50 µL of each inhibitor was added at 2x concentrated concentrations, and the cells were cultured for 24 hours. After 24 hours, the medium was removed and replaced with medium containing ISO and each inhibitor in the same way, and the cells were cultured for 24 hours. Cell viability was measured using the CellTiter 96 Aqueous One Solution Cell Proliferation Assay (Promega). After adding the assay reagent, the absorbance at 490 nm was measured using an iMark Microplate Reader (BIO-RAD) according to the research institute's protocol (Ito, 2016). In the ISO and drug-siRNA combination experiments, the cells were first treated with siRNA and cultured for 24 hours in serum-free medium. After 24 hours, the medium was removed and replaced with medium containing ISO, drug, and 10% bovine serum. After another 24 hours, the medium was replaced again in the same way, and the cells were cultured for 24 hours. In total, cells were treated with siRNA for 72 h and then cultured in the presence of ISO and drugs for 48 h. In the experiment of combining sorafenib and cell death inhibitors, a cell death inhibitor was first added at a concentration twice as high and incubated for 4 hours, after which sorafenib was added at a concentration twice as high and measurements were taken after 48 hours of incubation.
