# Supplementary material for: Stress-Induced Catecholamines Attenuate Sorafenib Efficacy by Inhibiting Ferroptosis in β2-adrenergic Receptor Positive Renal Cell Carcinoma
Source: Research Square preprint supplement (doi:10.21203/rs.3.rs-7131878/v1), 2025-08-27
Supplement: Supplementary file 8 [file 868011912c1ccda2de75a461.docx]

**Supplementary Text 6. Detailed procedures of GloSensor cAMP assay**

ACHN and A-498 were co-transfected with GloSensor cAMP using Lipofectamine 3000 (Invitrogen). After 24 hours of transfection, the cells were harvested and incubated with endotoxin-free luciferin 2 mM for 2 hours. The cells were then treated with 10 μM ISO. Luciferase luminescence activity was measured using a luminometer (GLOMAX 20/20 LUMINOMETER, Promega) at baseline, after ISO treatments for 1, 3, 5, 10, and 15 minutes, and then every 15 minutes up to 120 minutes.
