# Supplementary material for: Stress-Induced Catecholamines Attenuate Sorafenib Efficacy by Inhibiting Ferroptosis in β2-adrenergic Receptor Positive Renal Cell Carcinoma
Source: Research Square preprint supplement (doi:10.21203/rs.3.rs-7131878/v1), 2025-08-27
Supplement: Supplementary file 9 [file 8ed2e702bf77f2b250295836.docx]

**Supplementary Text 1. Detailed procedures of immunohistochemical staining**

The excised specimens were fixed in 10% formalin and then paraffin-embedded for histologic staining. The samples were cut into 3 μm thick sections, placed on Cyanoacrylate®-coated slides (Dako, Tokyo, Japan), and baked at 60 ℃ for 1 hour on a heating plate. After three 5-minute penetrations of xylene and four 5-minute penetrations of 100% ethanol, paraffin was removed, and the samples were dehydrated and hydrated. The samples were then subjected to an antigen inactivation procedure at 120°C for 20 minutes using a 10 mM Tris 1 mM EDTA (pH 9.0) solution. To inhibit endogenous peroxidase, samples were immersed in a 3% hydrogen peroxide-containing methanol solution for 10 minutes. For the primary antibody reaction, rabbit anti-ADRB1 polyclonal antibody (1:50, Cat. No. 12271s) and rabbit anti-ADRB2 polyclonal antibody (1:50, Cat. No. 8513) (both from Cell Signaling Technology Japan (Osaka, JAPAN)) were incubated overnight at 4℃ in a humid environment, and then washed with PBS. For secondary antibody reaction, Histofine Simple Stain MAX-PO® (Nichirei, Tokyo, Japan) was incubated for 30 minutes at room temperature, and then the color was developed by reacting with Diaminobenzidine® (D5905, SIGMA-ALDRICH) for 20 minutes. Hematoxylin staining was performed for nuclear staining for comparative staining.
