# Supplementary material for: Stress-Induced Catecholamines Attenuate Sorafenib Efficacy by Inhibiting Ferroptosis in β2-adrenergic Receptor Positive Renal Cell Carcinoma
Source: Research Square preprint supplement (doi:10.21203/rs.3.rs-7131878/v1), 2025-08-27
Supplement: Supplementary file 10 [file 9c59afb2166a57ffd4721a5e.docx]

**Supplementary Text 3. Materials in Western blot analyses**

Western Blot Hyper HRP Substrate (TaKaRa Bio Inc., Shiga, Japan) and Western Blot Ultra HRP Substrate® (TaKaRa Bio Inc.,) were used. Image acquisition was performed with a Light Capture AE-6981 system® (ATTO, Tokyo, Japan), and analysis was performed with CS Analyzer ver 3.0 for Windows® (ATTO). For the detection of β-receptor proteins, ADRB1 (Cat. No. 28323-1-AP) purchased from Proteintech Group Inc., (IL, USA) and ADRB2 (Cat. No. 8513) antibodiy purchased from Cell Signaling Technology Japan, were used. The following antibodies were used to detect intracellular signaling molecules: p38 MAPK (p38) (Cat. No. 8690), p-p38 (T180/Y182) (Cat. No. 4511), Jun-amino-teminal kinase (JNK) (Cat. No. 9252), p-JNK (T183/Y185) (Cat. No. 4668), Extracellular signal-related protein kinase 1/2 (Erk1/2) (Cat. No. 9102), p-Erk1/2 (T202/Y204) (Cat. No. 4370), Akt (Cat. No. 9272) and p-Akt (S473) (Cat. No. 4060) from Cell Signaling Technology Japan. α-Tubulin (Cat. No. 017-25031) was purchased from FUJIFILM Wako. Anti-mouse IgG, HRP conjugated (Cat. No. NA931V, GE Healthcare, UK) was used as the secondary antibody for α-Tubulin detection, and the anti-rabbit IgG, HRP conjugated (Cat. No. P0448, Dako) was used for other than α-tubulin detection.
