# Supplementary material for: Stress-Induced Catecholamines Attenuate Sorafenib Efficacy by Inhibiting Ferroptosis in β2-adrenergic Receptor Positive Renal Cell Carcinoma
Source: Research Square preprint supplement (doi:10.21203/rs.3.rs-7131878/v1), 2025-08-27
Supplement: Supplementary file 11 [file 9f43f5fa238fe1e7d900b400.docx]

**Supplementary Text 9. Detailed procedures of assessment of MDA levels**

MDA concentrations in cell lysates were assessed using MDA assay kit (Cat. No. M496, Dojindo, Kumamoto, Japan) according to the manufacturer's instructions. Fluorescence was measured using a fluorescence plate reader (varioskan LUX, Thermo Fisher Scientific Inc.,).
