# Supplementary material for: Stress-Induced Catecholamines Attenuate Sorafenib Efficacy by Inhibiting Ferroptosis in β2-adrenergic Receptor Positive Renal Cell Carcinoma
Source: Research Square preprint supplement (doi:10.21203/rs.3.rs-7131878/v1), 2025-08-27
Supplement: Supplementary file 12 [file ef847a4790dd3e6008844358.xlsx]

## Sheet: ADRB1
Table S2. qPCR data of Fig. 1B
	ADRB1			GAPDH					ADRB2			GAPDH
	Ct	Avr.	Std	Ct	Avr.	Std			Ct	Avr.	Std	Ct	Avr.	Std
ACHN	24.0111	23.9649	0.0799053	12.0799	12.0381	0.0547124		ACHN		18.6729	0.107197	12.0799	12.0381	0.0547124
	24.0109			12.0583					18.5971			12.0583
	23.8726			11.9762					18.7487			11.9762
A704	31.8587	31.6883	0.426916	11.563	11.63	0.101025		A704	21.0661	21.1163	0.0576207	11.563	11.63	0.101025
	32.0037			11.5808					21.1035			11.5808
	31.2025			11.7462					21.1792			11.7462
A498	26.7016	26.7325	0.14976	12.7505	12.7817	0.0289797		A498	24.7055	24.823	0.133707	12.7505	12.7817	0.0289797
	26.6006			12.7867					24.7951			12.7867
	26.8953			12.8078					24.9685			12.8078
786O	30.0249	30.4312	0.41522	12.1675	12.1952	0.0599238		786O	26.8013	26.9149	0.10237	12.1675	12.1952	0.0599238
	30.4139			12.1542					26.9434			12.1542
	30.8548			12.264					27			12.264
769P	29.2562	28.937	0.354919	12.274	12.278	0.0628955		769P	25.9975	25.877	0.208222	12.274	12.278	0.0628955
	29			12.3428					25.6366			12.3428
	28.5548			12.2172					25.997			12.2172
